# Supplementary material
Source: ML conference proceedings conference paper supplement (https://aclanthology.org/D18-1376)
Supplement: Attachment [file emnlp2018_camera_ready_appendix.pdf › emnlp2018_camera_ready_appendix.pdf]

## A Supplemental Materials

### A.1 Complete Training Procedure

The complete training procedure is shown in Algorithm 2 in the next page.

### A.2 Random Policy and Oracle Policy Performances

The random policy randomly selects  $K$  comments at each step. The oracle policy knows the true karma score of each comment in the datasets and it always chooses the top- $K$  comments with highest true karma scores at each step. Table 7 shows the performance of the random policy and the oracle policy on different datasets when  $N = 10$  and  $K = 3$ . Table 8 shows the performance of the random policy and the oracle policy across various action sizes with  $K = 2, 3, 4, 5$  and fix  $N = 10$  on the askscience dataset.

| Subreddit     | Random Policy    | Oracle Policy     |
|---------------|------------------|-------------------|
| askscience    | $392.0 \pm 10.1$ | $1695.4 \pm 48.4$ |
| askmen        | $188.0 \pm 4.4$  | $524.5 \pm 26.3$  |
| todayilearned | $528.3 \pm 29.0$ | $1994.5 \pm 65.2$ |
| worldnews     | $351.4 \pm 11.5$ | $1328.0 \pm 40.1$ |
| nfl           | $328.3 \pm 14.6$ | $1032.5 \pm 5.7$  |

Table 7: Performance of the random policy and the oracle policy on different datasets

| K | Random Policy    | Oracle Policy     |
|---|------------------|-------------------|
| 2 | $254.1 \pm 20.9$ | $1571.2 \pm 27.8$ |
| 3 | $392.0 \pm 10.1$ | $1695.4 \pm 48.4$ |
| 4 | $589.3 \pm 22.0$ | $1697.8 \pm 35.3$ |
| 5 | $745.9 \pm 26.4$ | $1808.5 \pm 47.2$ |

Table 8: Performance of the random policy and the oracle policy with different action size on askscience dataset

---

**Algorithm 2** Q-learning

---

```
1: Initialize the experience memory  $D$ 
2: Initialize  $\theta$  randomly
3: Set  $\theta^- = \theta$ 
4: for  $episode = 1 \rightarrow H$  do
5:   Randomly pick a discussion tree
6:   Read the initial state  $s_1$ , and a set of possible sub-actions,  $c_1 = \{c_{1,1}, \dots, c_{1,K}\}$ 
7:   for  $t = 1 \rightarrow +\infty$  do
8:     if  $rand() < \epsilon$  then
9:       Select action  $a_t = \text{Greedy}(s_t, c_t, Q(\cdot, \cdot; \theta), K)$ 
10:    else
11:      Select action  $a_t$  uniformly at random
12:    Observe reward  $r_{t+1}$ 
13:    Read the next state  $s_{t+1}$ , and next set of possible sub-actions,  $c_{t+1} = \{c_{0,1}, \dots, c_{0,K}\}$ 
14:    Store a transition tuple,  $(s_t, a_t, r_{t+1}, s_{t+1}, c_{t+1})$  in  $D$ 
15:    Sample random mini batch of transition tuples  $(s_j, a_j, r_{j+1}, s_{j+1}, c_{j+1})$  from  $D$ 
16:    Set
      
$$y_j = \begin{cases} r_{j+1} & \text{if } s_{j+1} \text{ is terminal} \\ r_{j+1} + \gamma \max_{a'} Q(s_{j+1}, a'; \theta^-) & \text{otherwise} \end{cases}$$

17:    Perform a step of gradient descent on the loss  $L(\theta) = (y_j - Q(s_j, a_j; \theta))$  with respect to  $\theta$ 
18:    Set  $\theta^- = \theta$  for every  $F$  steps
19:    if  $c_{t+1}$  is empty then break
```

---
